# Supplementary material
Source: Research Square preprint supplement (doi:10.21203/rs.3.rs-9374916/v1)
Supplement: Supplementary file 1 [file 317872b853b3d95807b245f0.pdf]

### Additional file 3

**Title:** Self-reported prevalence of risk factors of near-miss.

**Description:** Table showing the prevalence of anemia, gestational hypertension, and obstetric hemorrhage among pregnant women from Baliakandi who delivered in 2022.

| <b>Risk factors*</b>     | <b>n = 6774 (%)</b> |
|--------------------------|---------------------|
| Anemia                   | 2042 (30.1%)        |
| Gestational hypertension | 283 (4.2%)          |
| Obstetrics hemorrhage    | 262 (3.9%)          |

*\*A total of 2375 (35.1%) mothers had at least one of the above risk factors.*
