# Supplementary material
Source: Research Square preprint supplement (doi:10.21203/rs.3.rs-9374916/v1)

## Additional file 2

**Title:** Receiver Operating Characteristic (ROC) curve.

**Description:** ROC curve for the multivariate logistic regression analysis evaluating model discrimination.

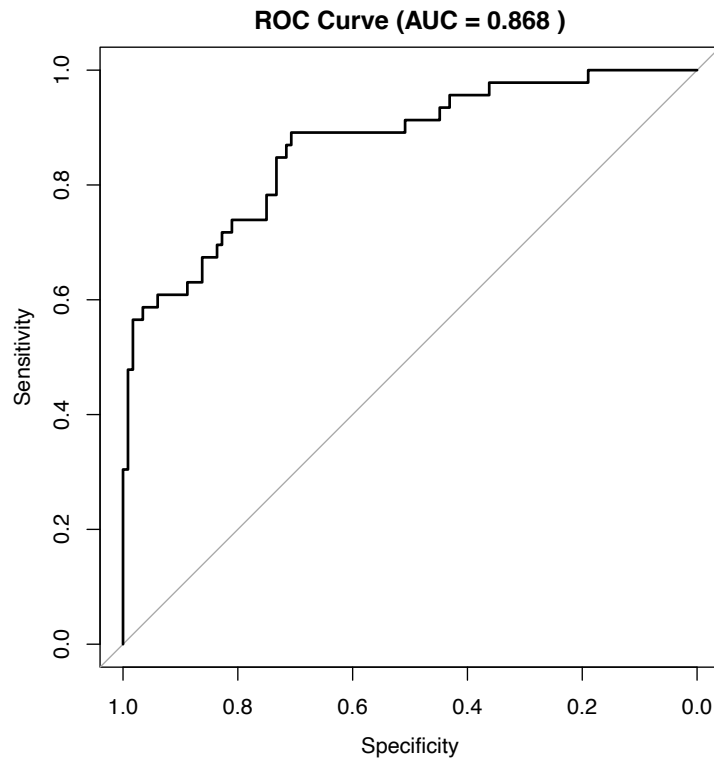

Supplement: Supplementary file 2 [file 88528845bf817e3f02a07685.pdf]
