# Supplementary material
Source: Research Square preprint supplement (doi:10.21203/rs.3.rs-9374916/v1)

## Additional file 1

**Title:** Directed acyclic graph (DAG) of the conceptual framework

**Description:** Hypothesized causal pathways through which different factors (distal, intermediate, and proximal) influence the risk of maternal near-miss (MNM).

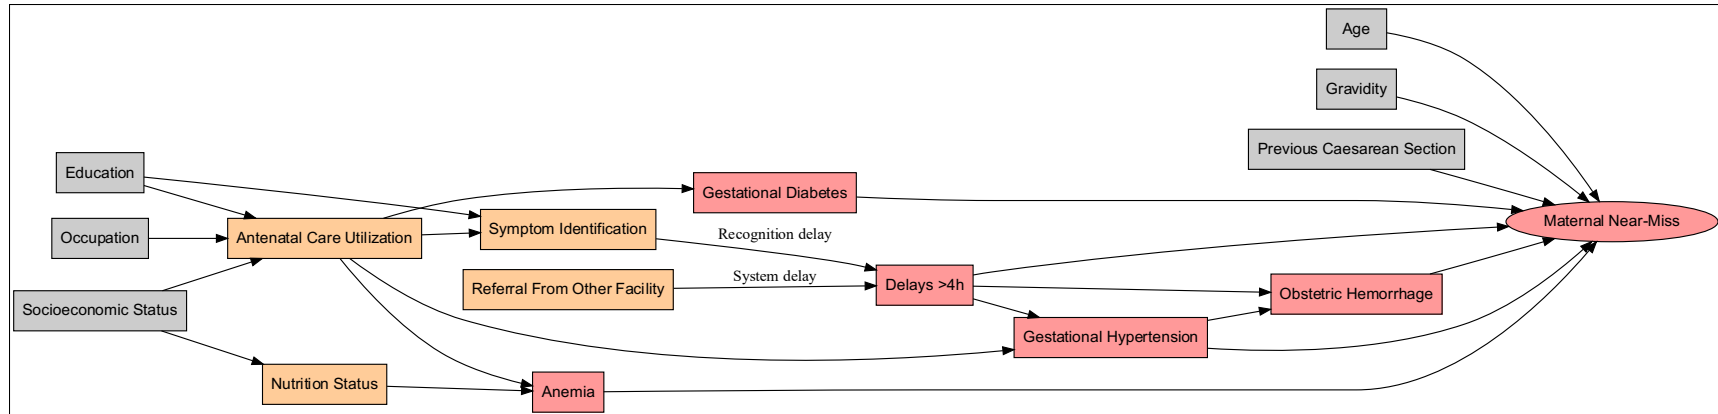

Supplement: Supplementary file 3 [file 92c1171a91e29b738b73e4f7.pdf]
